# Supplementary material
Source: MDPI journal article supplement (https://www.mdpi.com/2073-4344/13/1/162)
Supplement: s1 [file s1]

Supplementary Materials

# New In Situ Catalysts Based on Nitro Functional Pyrazole Derivatives and Copper (II) Salts for Promoting Oxidation of Catechol to *o*-Quinone

Abderrahim Titi <sup>1,\*</sup>, Kaoutar Zaidi <sup>1</sup>, Abdullah Y. A. Alzahrani <sup>2</sup>, Mohamed El Kodadi <sup>1,3</sup>, El Bekkaye Yousfi <sup>1,4</sup>, Anna Moliterni <sup>5</sup>, Belkheir Hammouti <sup>1</sup>, Rachid Touzani <sup>1,\*</sup> and Mohamed Abboud <sup>6,\*</sup>

<sup>1</sup> Laboratory of Applied and Environmental Chemistry (LCAE), Faculty of Sciences, University Mohammed Premier, Oujda 60000, Morocco; zaidikaoutar96@gmail.com (K.Z.); elkodadim@yahoo.fr (M.E.K.); yousfi@netcourrier.com (E.B.Y.); hammoutib@gmail.com (B.H.)

<sup>2</sup> Department of Chemistry, Faculty of Science and Arts, King Khalid University, Mohail Assir 62529, Saudi Arabia; ayalzahrani@kku.edu.sa

<sup>3</sup> Laboratoire d'Innovation en Sciences, Technologie et Education (LISTE), CRMEF, Oujda 60000, Morocco

<sup>4</sup> Higher Institute of Nursing and Health Professions Techniques (ISPITS), Oujda 60000, Morocco

<sup>5</sup> Istituto di Cristallografia, CNR, Via Amendola, 122/0, 70126 Bari, Italy; annagrazia.moliterni@ic.cnr.it

<sup>6</sup> Catalysis Research Group (CRG), Department of Chemistry, College of Science, King Khalid University, P.O. Box 9004, Abha 61413, Saudi Arabia

\* Correspondence: titi\_abderrahim1718@ump.ac.ma (A.T.); r.touzani@ump.ac.ma (R.T.); mabboud@kku.edu.sa (M.A.)

## 1. Characterization

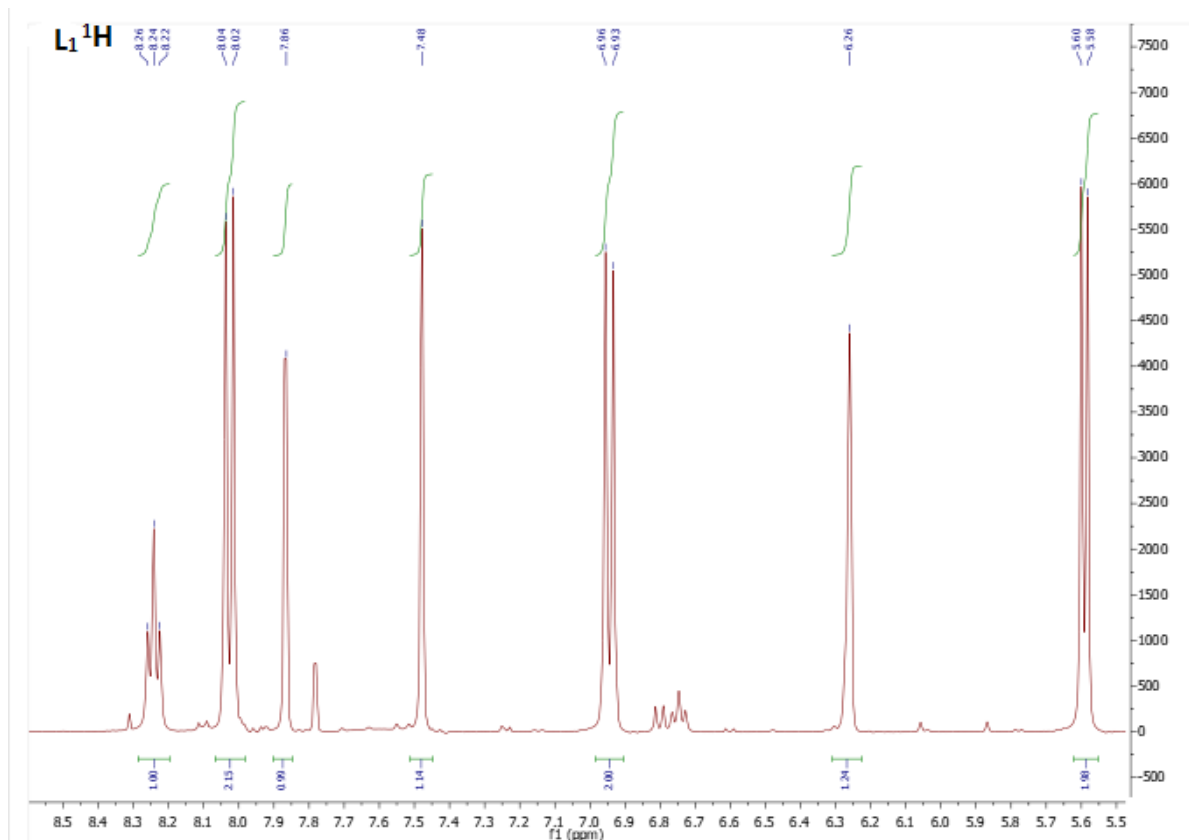

**Figure S1.** <sup>1</sup>H NMR spectrum of L1 in DMSO (400 MHz).

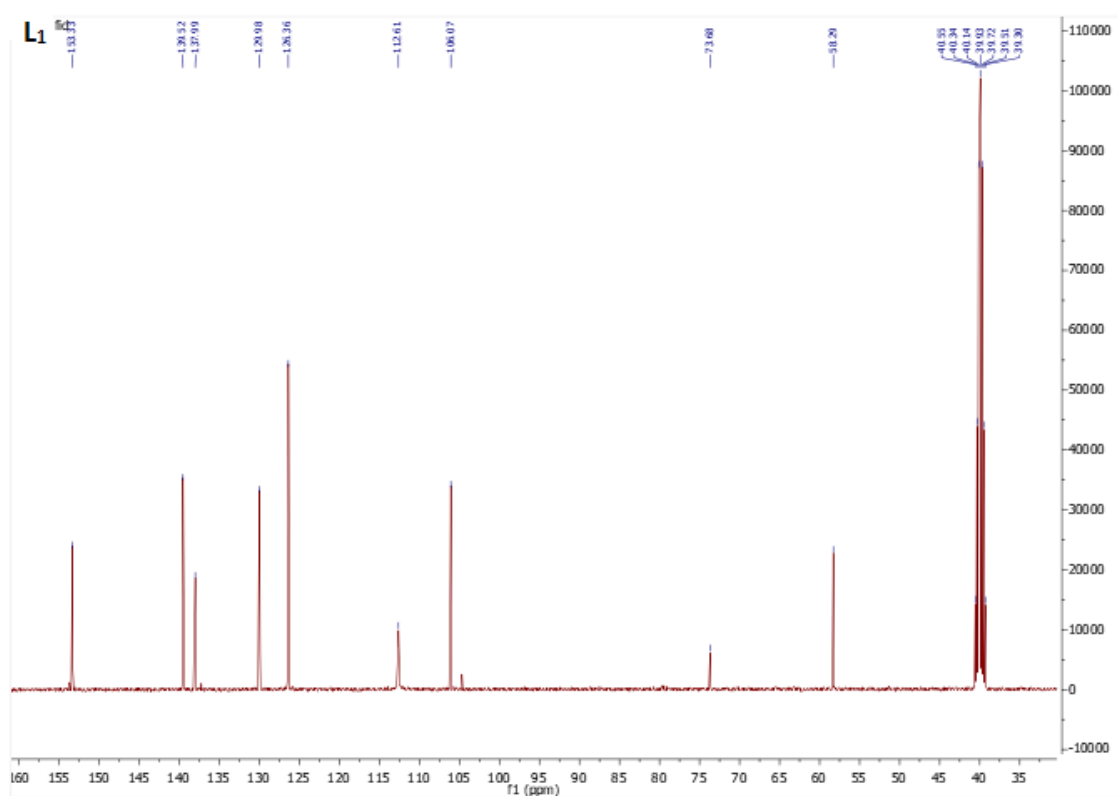

Figure S2. <sup>13</sup>C NMR spectrum of **L1** in DMSO (400 MHz).

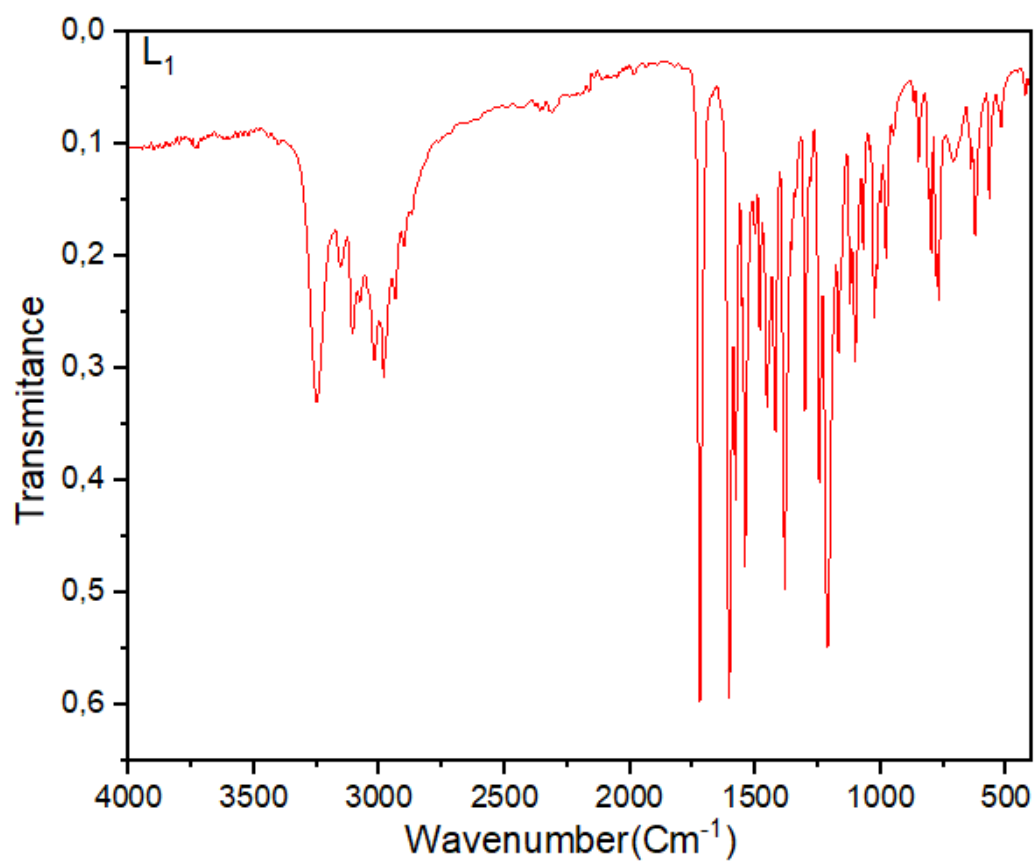

Figure S3. FT-IR spectrum of **L1**.

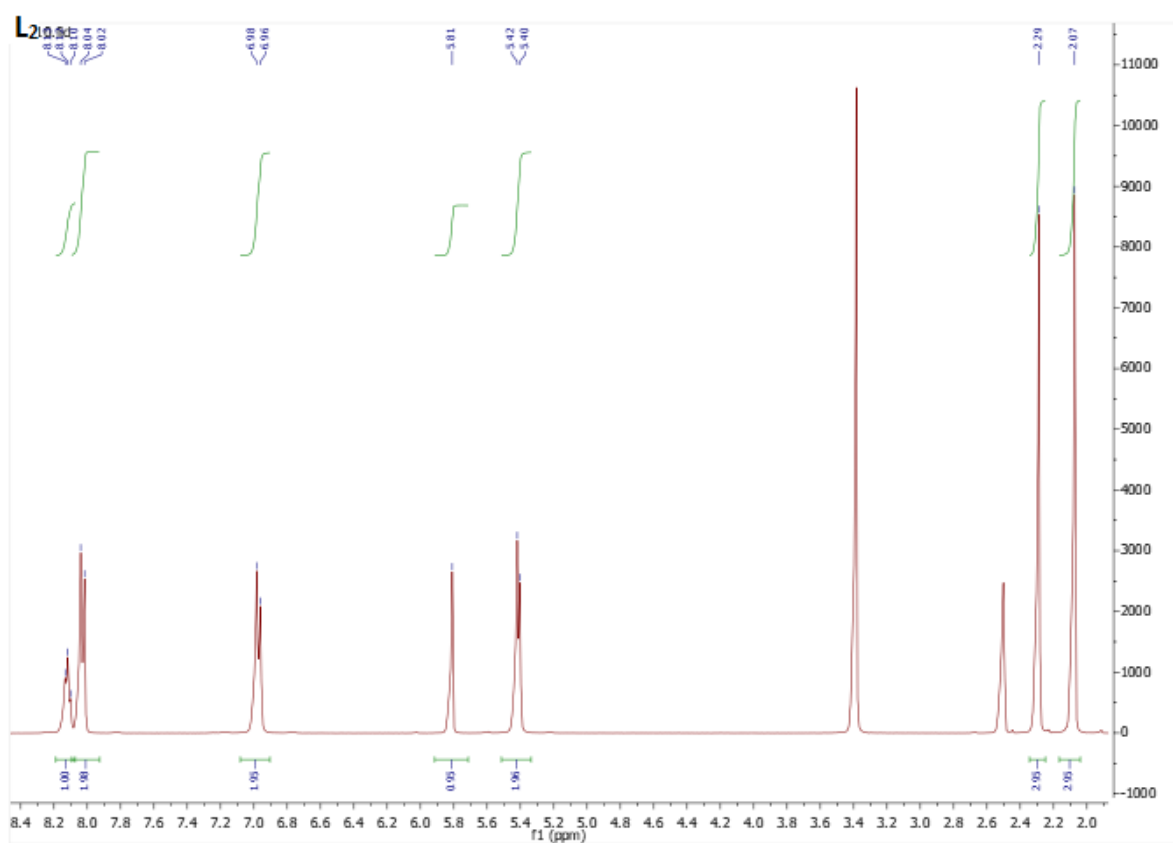

Figure S4.  $^1\text{H}$  NMR spectrum of  $\text{L}_2$  in DMSO ( $400\text{ MHz}$ ).

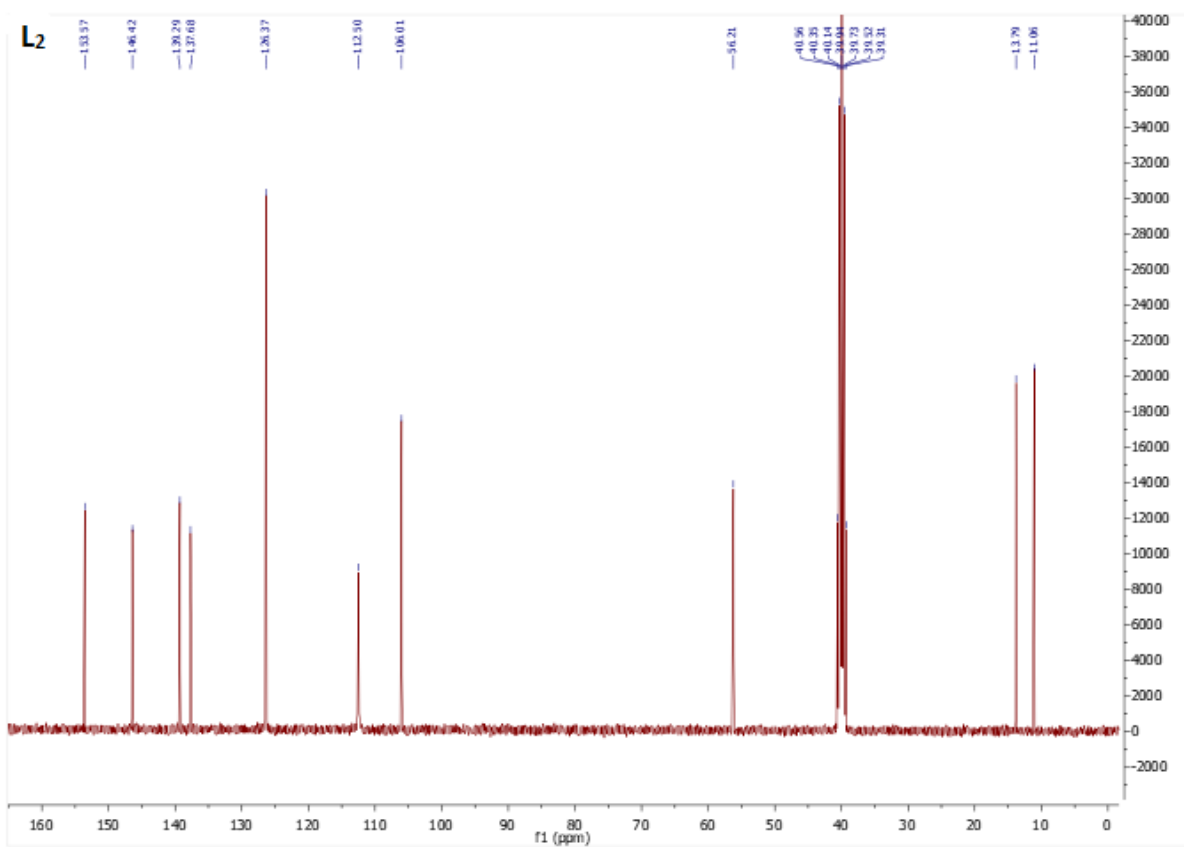

Figure S5.  $^{13}\text{C}$  NMR spectrum of  $\text{L}_2$  in DMSO ( $400\text{ MHz}$ ).

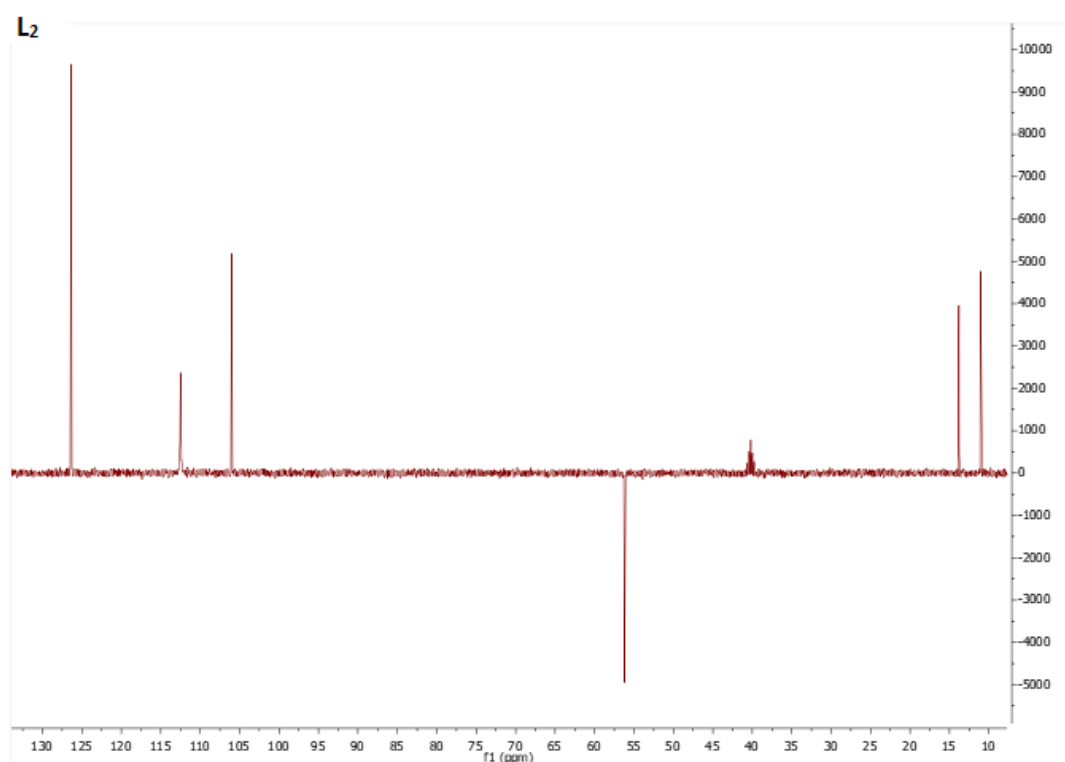

Figure S6. DEPT- 135 NMR spectrum of L<sub>2</sub> in DMSO (400 MHz).

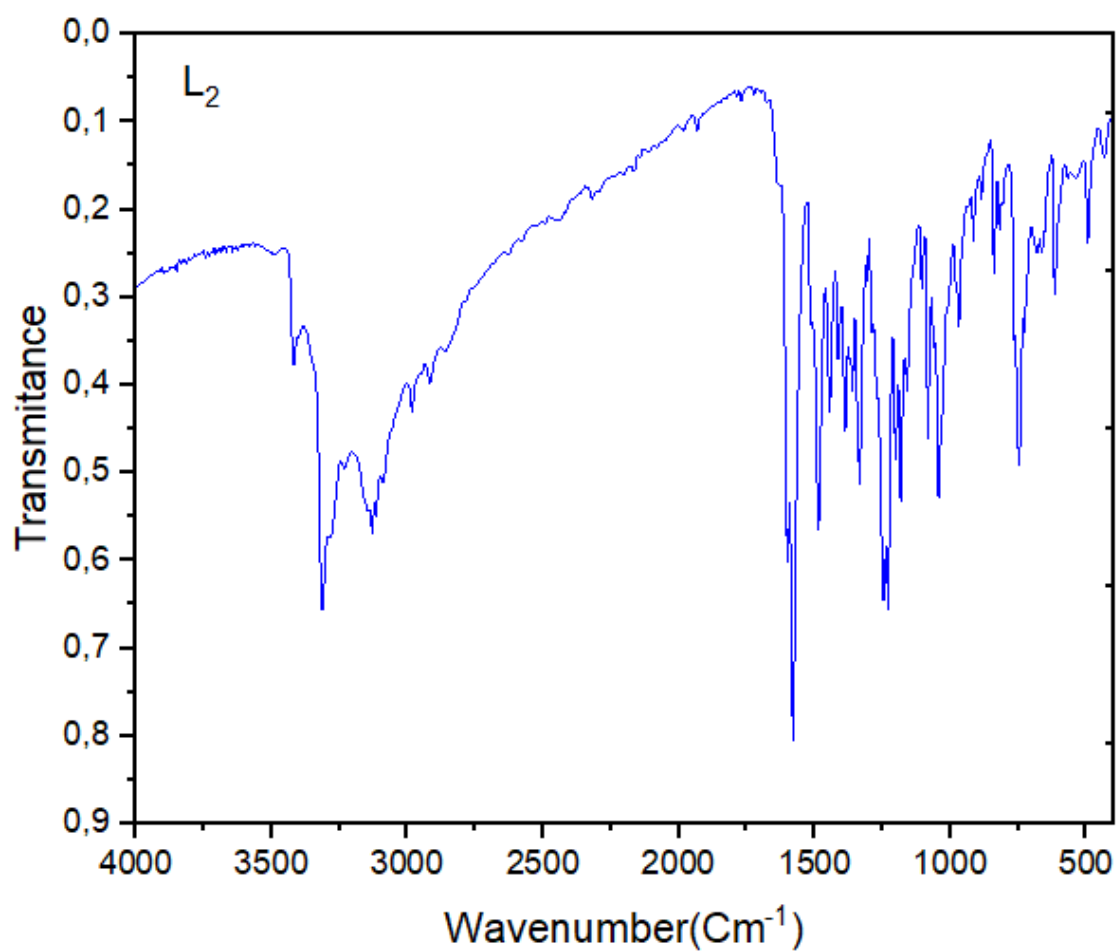

Figure S7. FT-IR spectrum of L<sub>2</sub>.

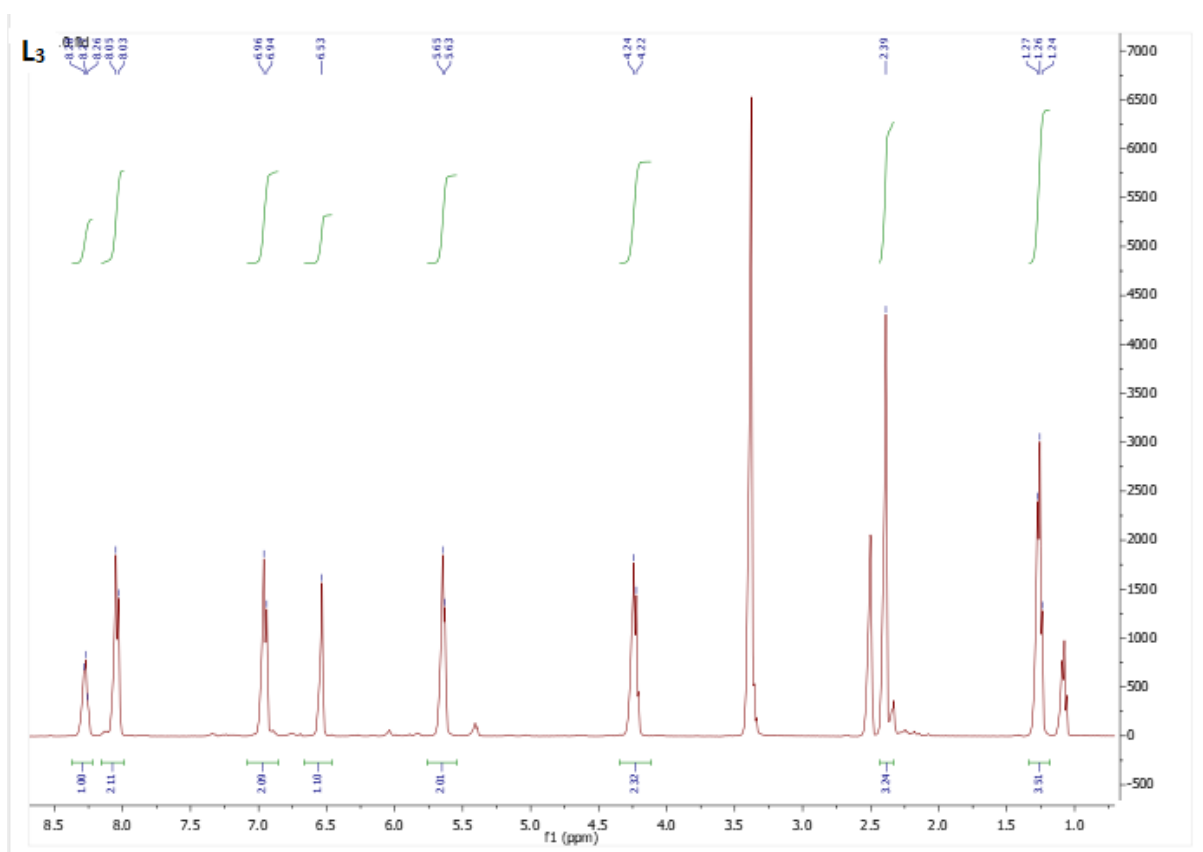Figure S8. <sup>1</sup>H NMR spectrum of L3 in DMSO (400 MHz).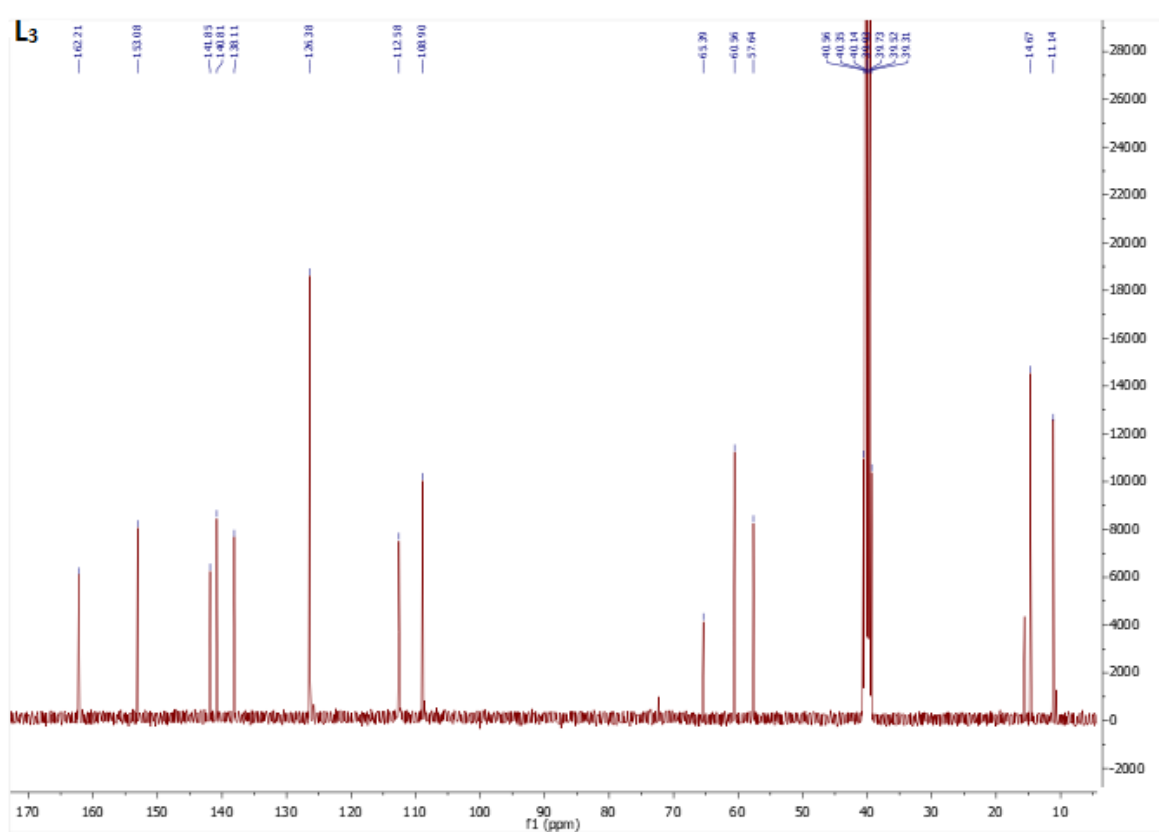Figure S9. <sup>13</sup>C NMR spectrum of L3 in DMSO (400 MHz).

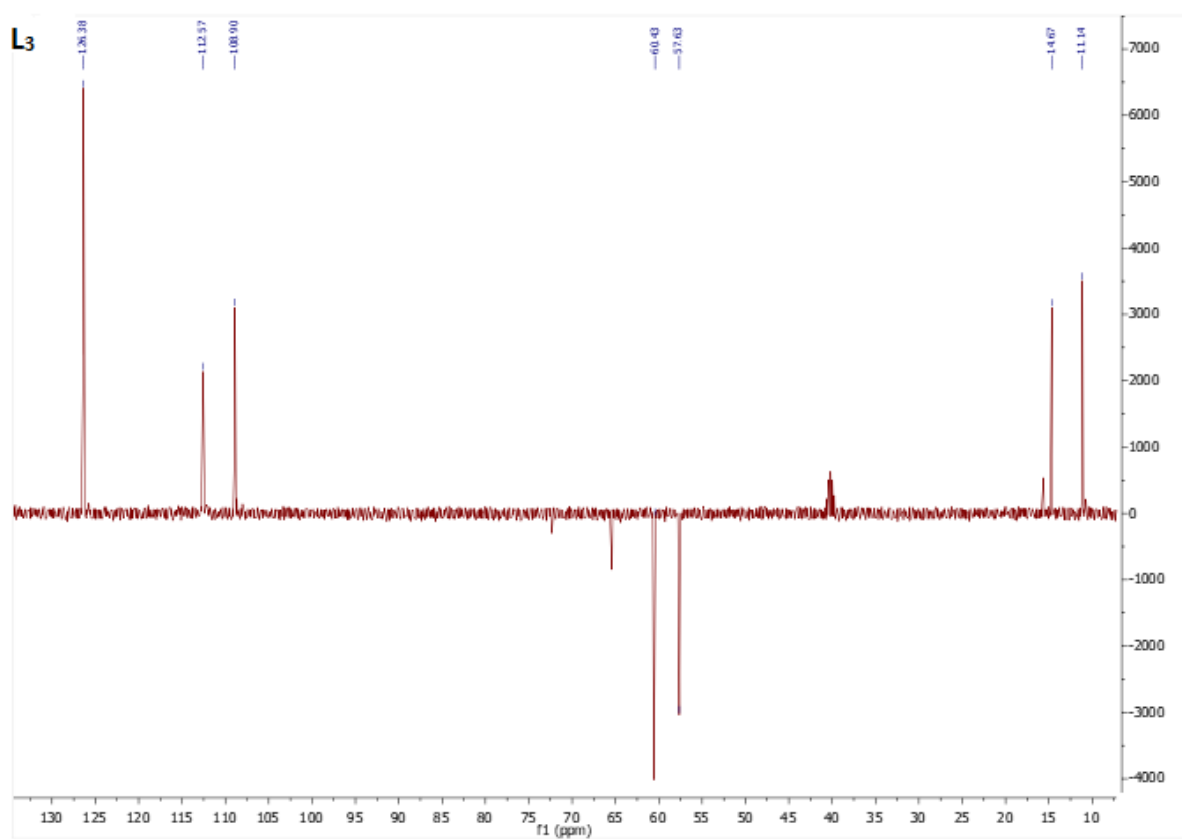

Figure S10. DEPT- 135 NMR spectrum of L<sub>3</sub> in DMSO (400 MHz).

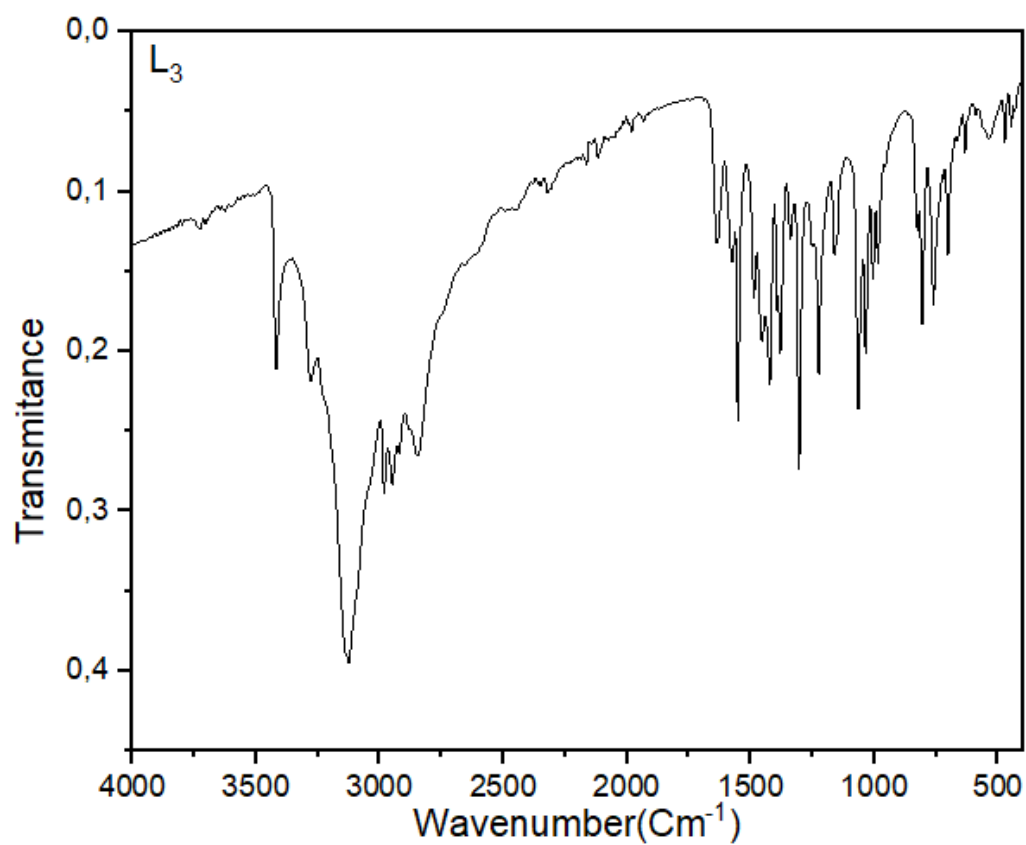

Figure S11. FT-IR spectrum of L<sub>3</sub>.

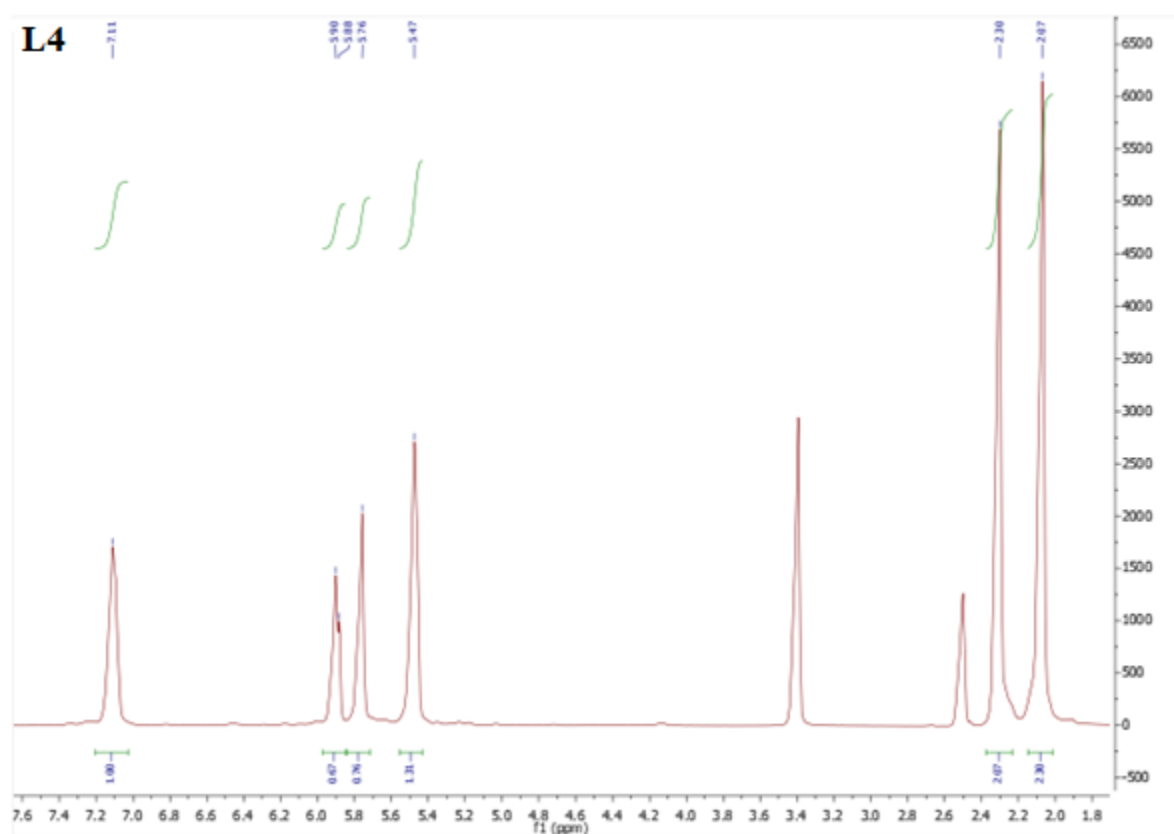

Figure S12.  $^1\text{H}$  NMR spectrum of L4 in DMSO (400 MHz).

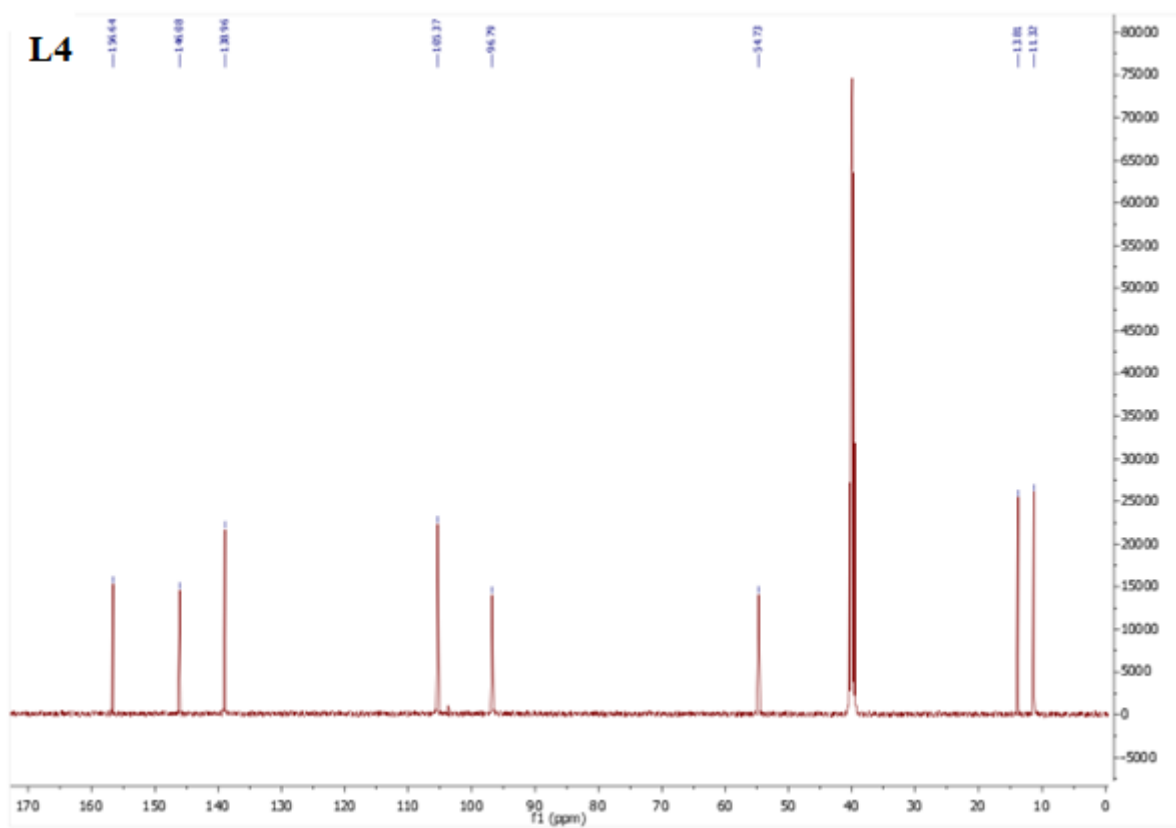

Figure S13.  $^{13}\text{C}$  NMR spectrum of L4 in DMSO (400 MHz).

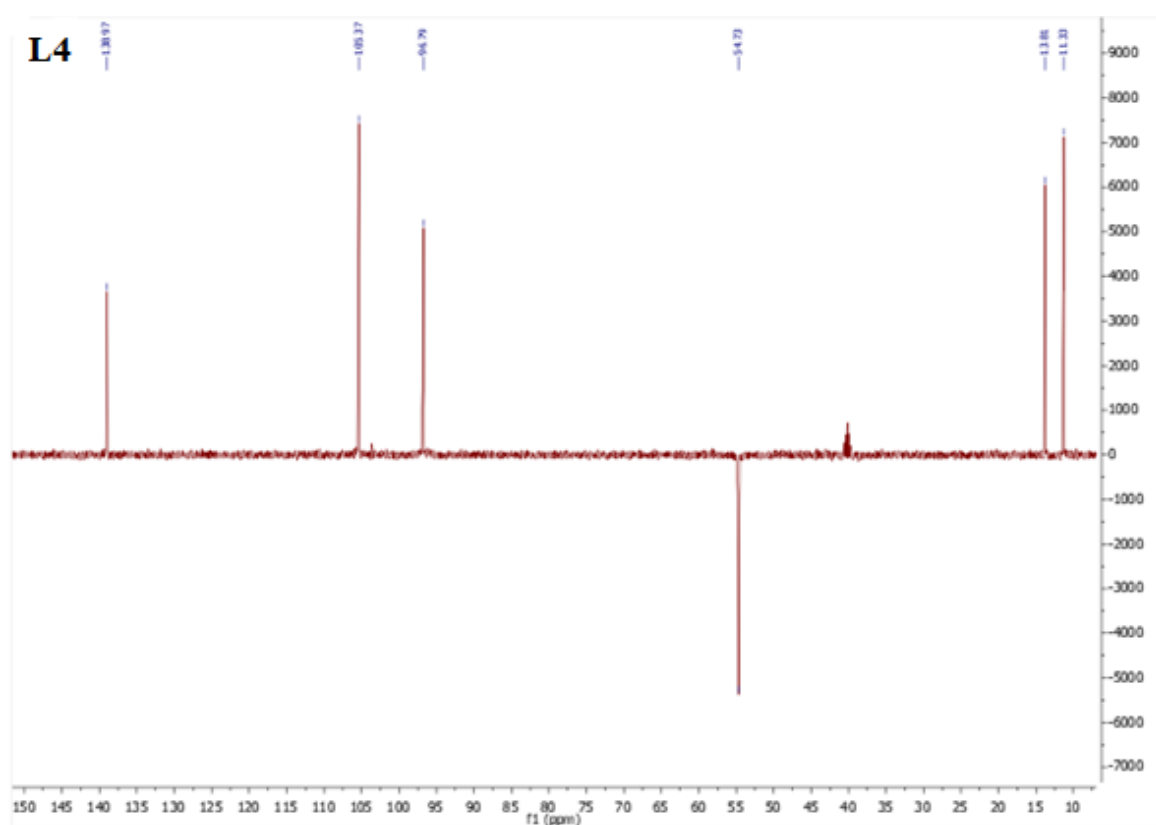

Figure S14.  $^{13}\text{C}$  NMR spectrum of L4 in DMSO (400 MHz).

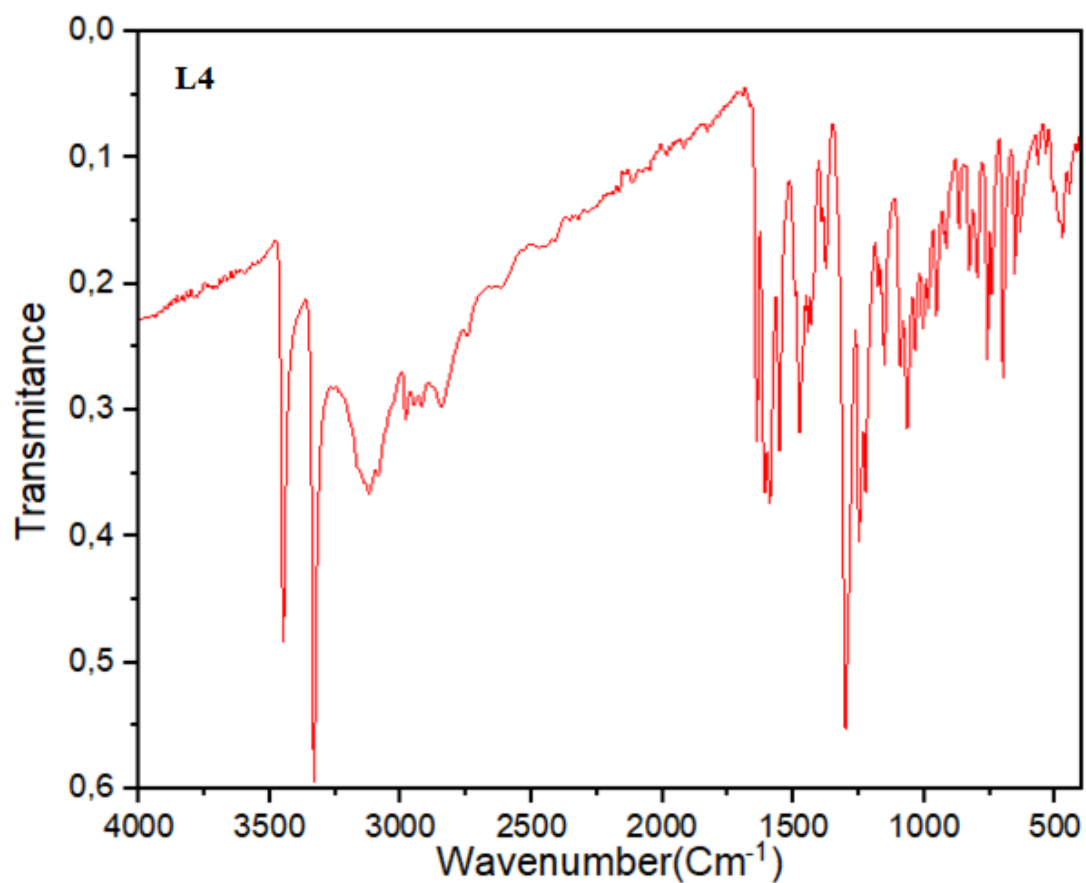

Figure S15. FT-IR spectrum of L4.



## 2. Effect of concentration

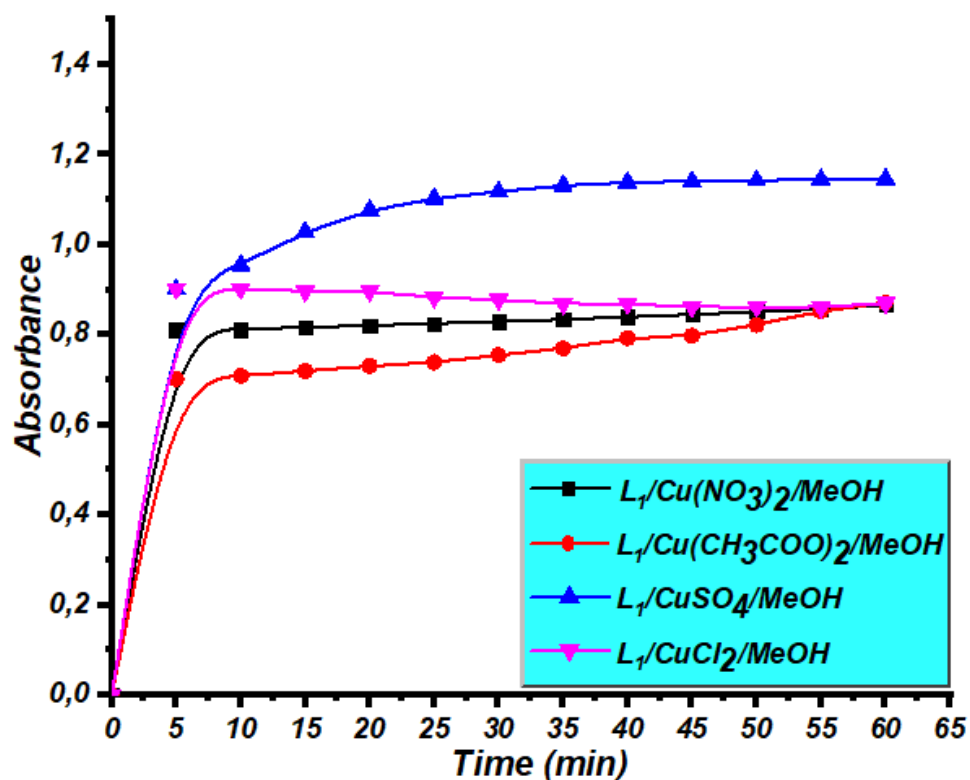

Figure S16. Absorbance evolution of *o*-quinone in presence of complexes formed by  $L_1$  and different copper salts in MeOH.

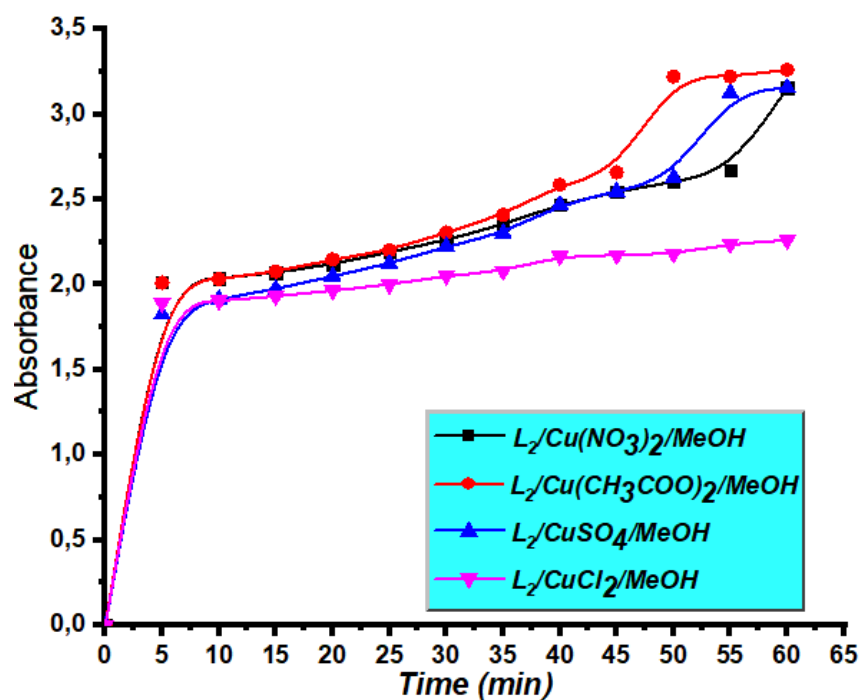

Figure S17. Absorbance evolution of *o*-quinone in presence of complexes formed by  $L_2$  and different copper salts in MeOH.

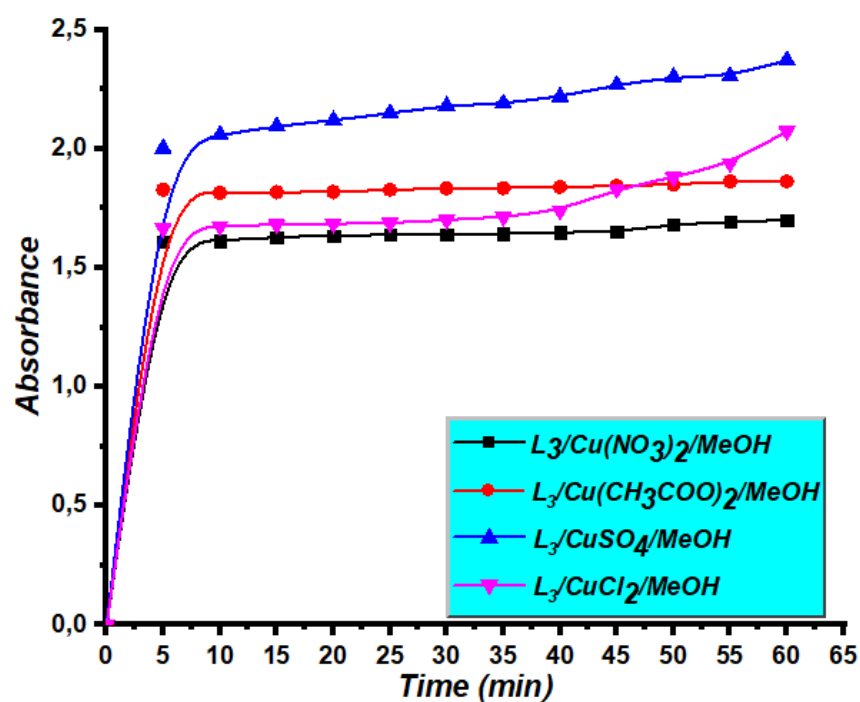

Figure S18. Absorbance evolution of *o*-quinone in presence of complexes formed by  $L_3$  and different copper salts in MeOH.

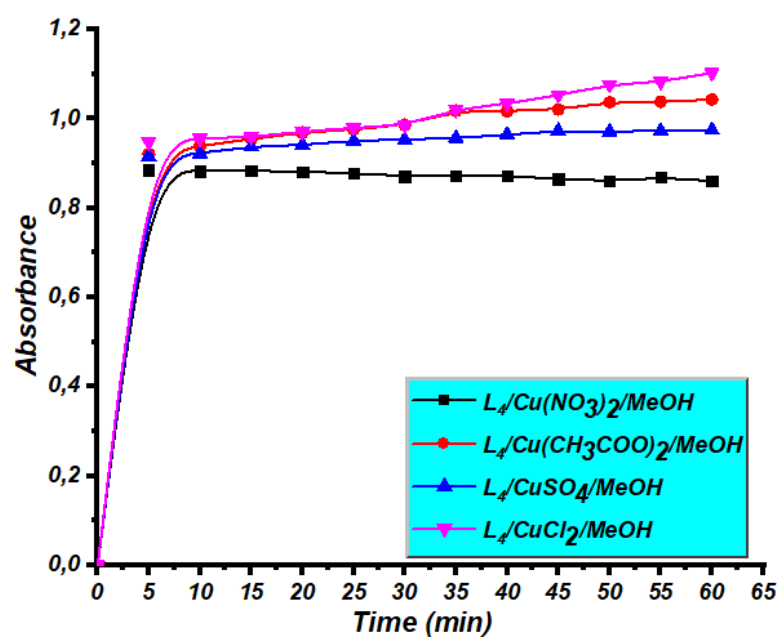

Figure S19. Absorbance evolution of *o*-quinone in presence of complexes formed by  $L_4$  and different copper salts in MeOH.

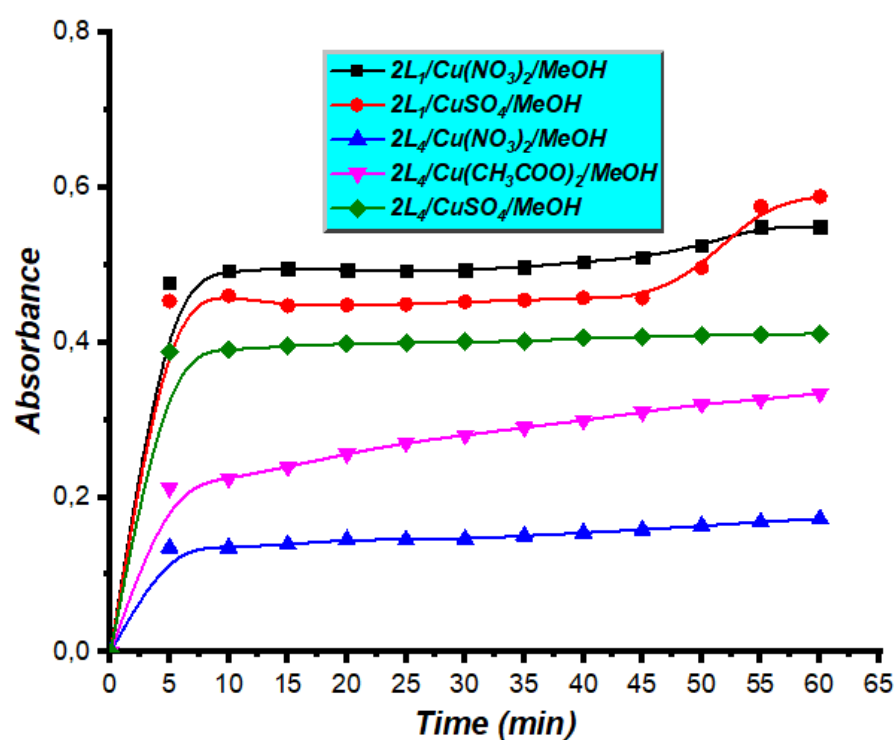

Figure S20. Absorbance evolution of *o*-quinone in presence of complexes formed by  $L_1$  and  $L_4$  with different copper salts in MeOH.

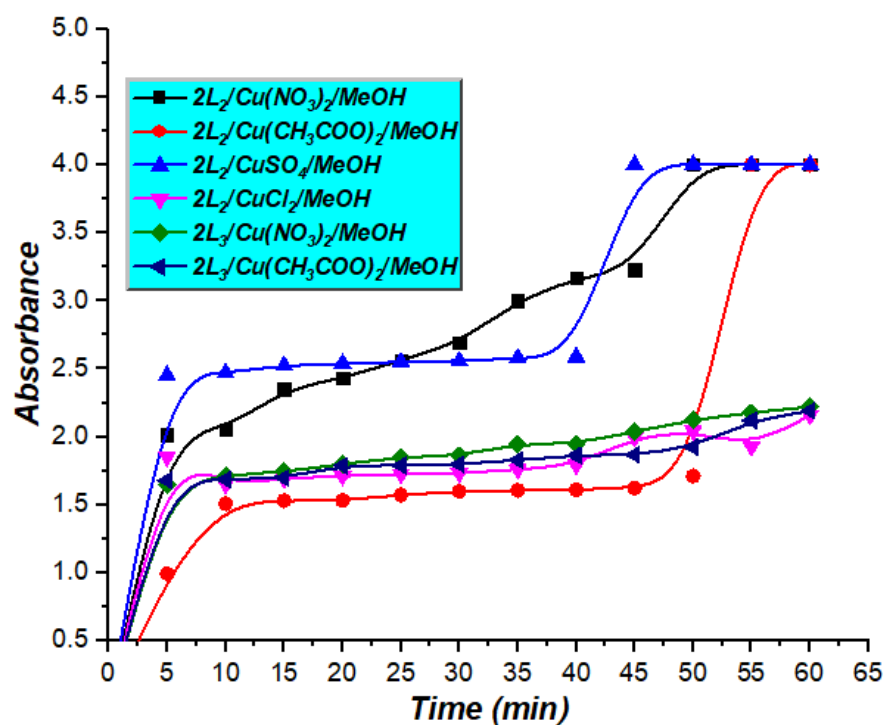

Figure S21. Absorbance evolution of *o*-quinone in presence of complexes formed by  $L_2$  and  $L_3$  with different copper salts in MeOH.

### 3. Solvent effect

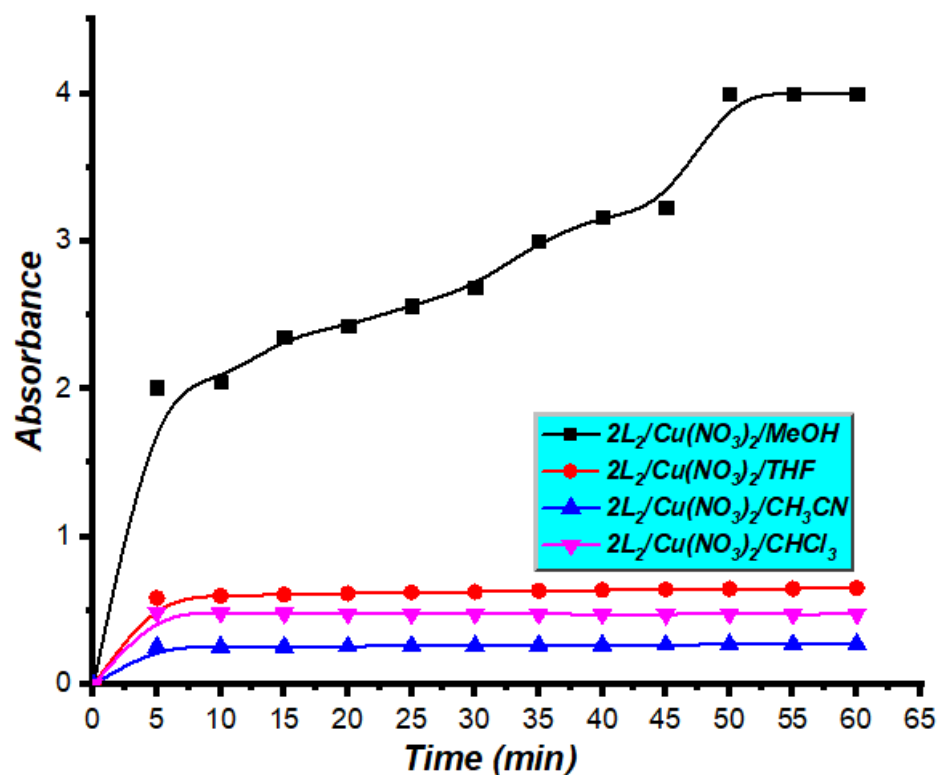

Figure S22. Absorbance evolution of *o*-quinone in presence of complexes formed by  $2L_2/Cu(NO_3)_2$  in different solvents.

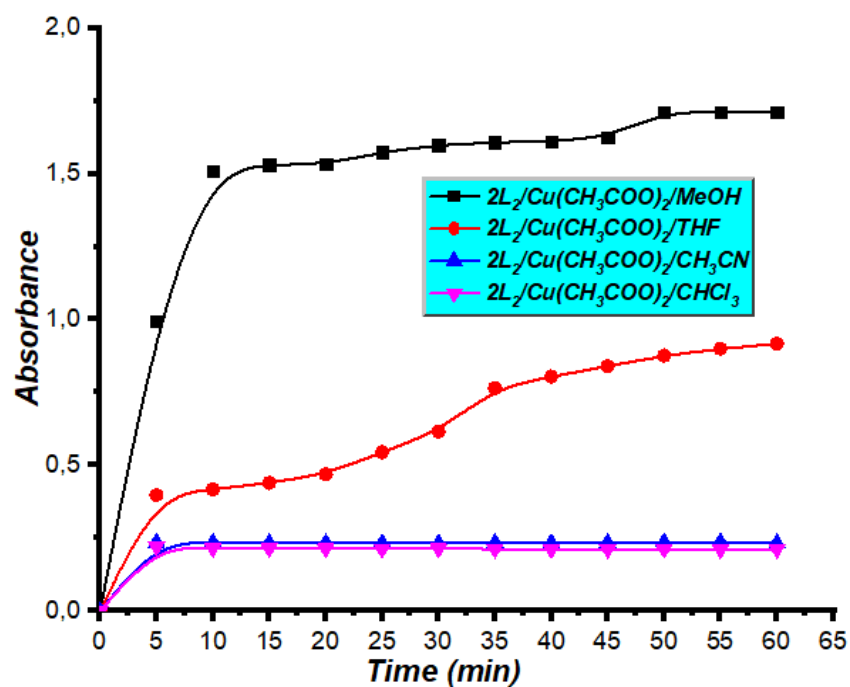

Figure S23. Absorbance evolution of *o*-quinone in presence of complexes formed by  $2L_2/Cu(CH_3COO)_2$  in different solvents.

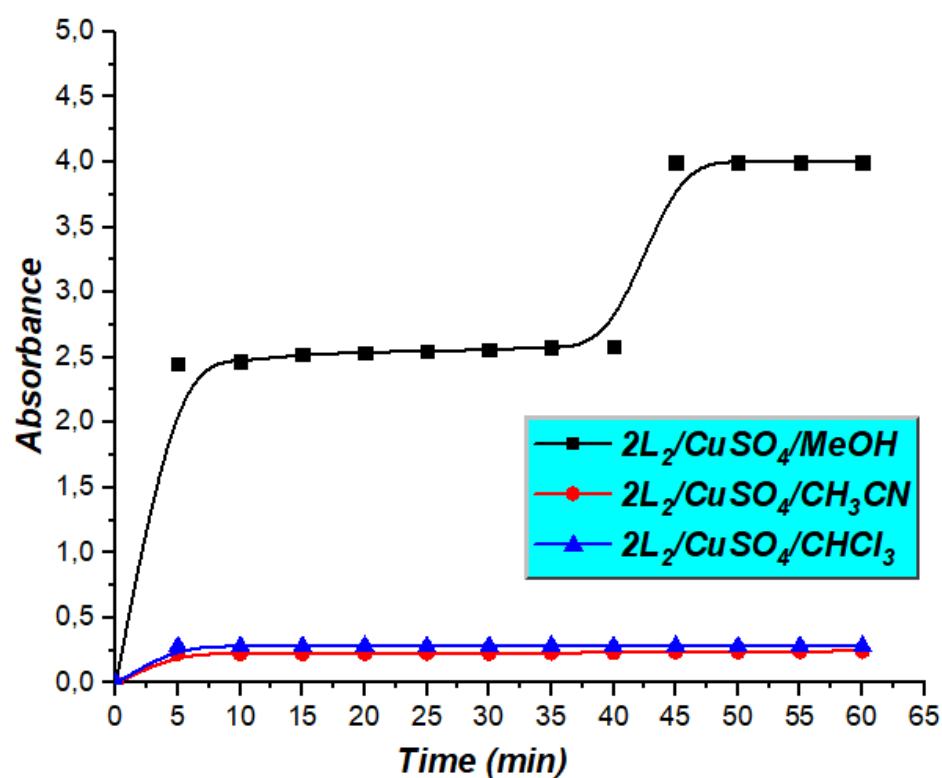

Figure S24. Absorbance evolution of *o*-quinone in presence of complexes formed by 2L<sub>2</sub>/CuCuSO<sub>4</sub> in different solvents.

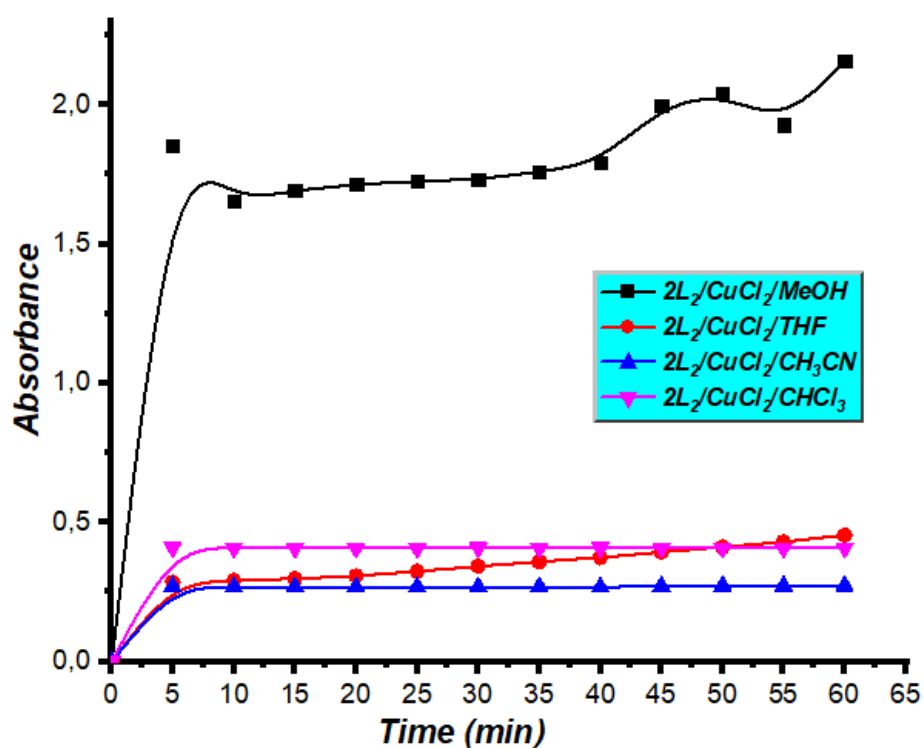

Figure S25. Absorbance evolution of *o*-quinone in presence of complexes formed by 2L<sub>2</sub>/CuCl<sub>2</sub> in different solvents.

## 4. Kinetic study

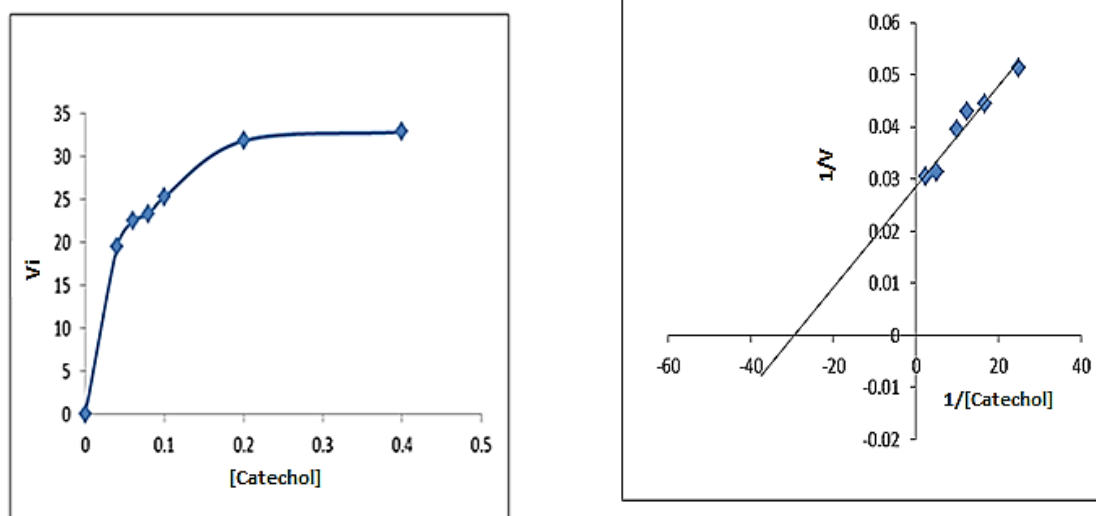Figure S26. Reaction dependence on the concentration of catechol using  $2L_2/Cu(NO_3)_2$ .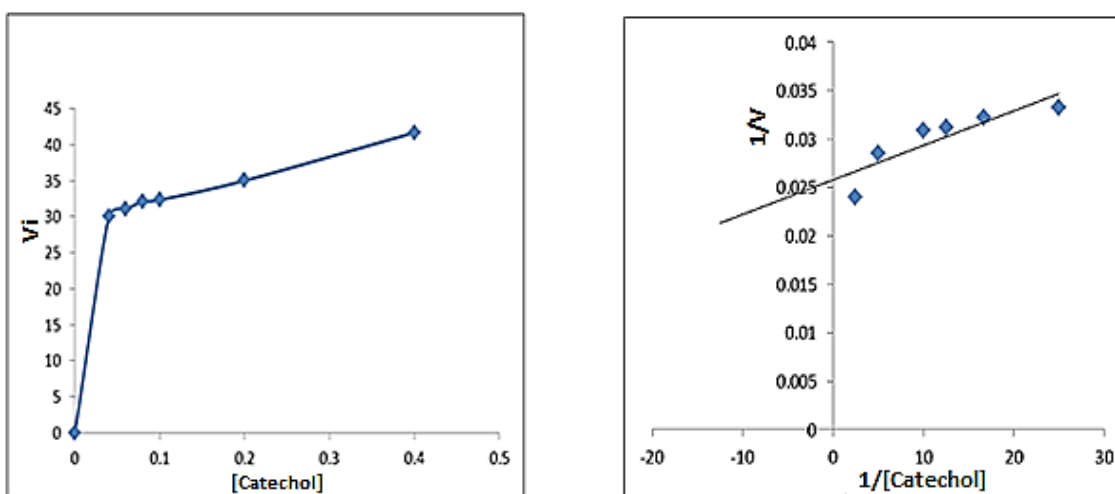Figure S27. Reaction dependence on the concentration of catechol using  $2L_2/Cu(CH_3COO)_2$ .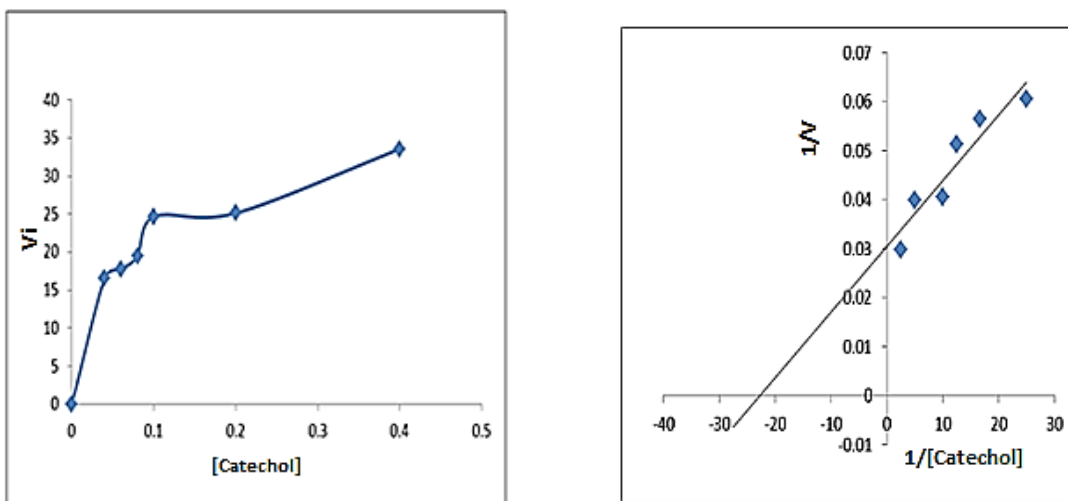Figure S28. Reaction dependence on the concentration of catechol using  $2L_2/CuSO_4$ .
